# Supplementary material for: Temporal-iCLIP captures co-transcriptional RNA-protein interactions
Source: PubMed Central journal article supplement (PMC9908952; doi:10.1038/s41467-023-36345-y), 2023-02-08
Supplement: 41467_2023_36345_MOESM1_ESM.pdf [file 41467_2023_36345_MOESM1_ESM.pdf]

## Supplementary Information

Temporal iCLIP captures co-transcriptional RNA-protein interactions

Ross A. Cordiner<sup>1,2</sup>, Yuhui Dou<sup>1,3</sup>, Rune Thomsen<sup>1</sup>, Andrii Bugai<sup>1</sup>, Sander Granneman<sup>2</sup>, Torben Heick Jensen<sup>1,\*</sup>

<sup>1</sup> Department of Molecular Biology and Genetics, Aarhus University, Universitetsbyen 81, 8000 Aarhus, Denmark

<sup>2</sup> Centre for Engineering Biology, University of Edinburgh, Mayfield Road, Edinburgh, EH9 3JD, UK

<sup>3</sup> Present address: Friedrich Miescher Institute for Biomedical Research, 4058 Basel, Switzerland

\* Corresponding author: thj@mbg.au.dk

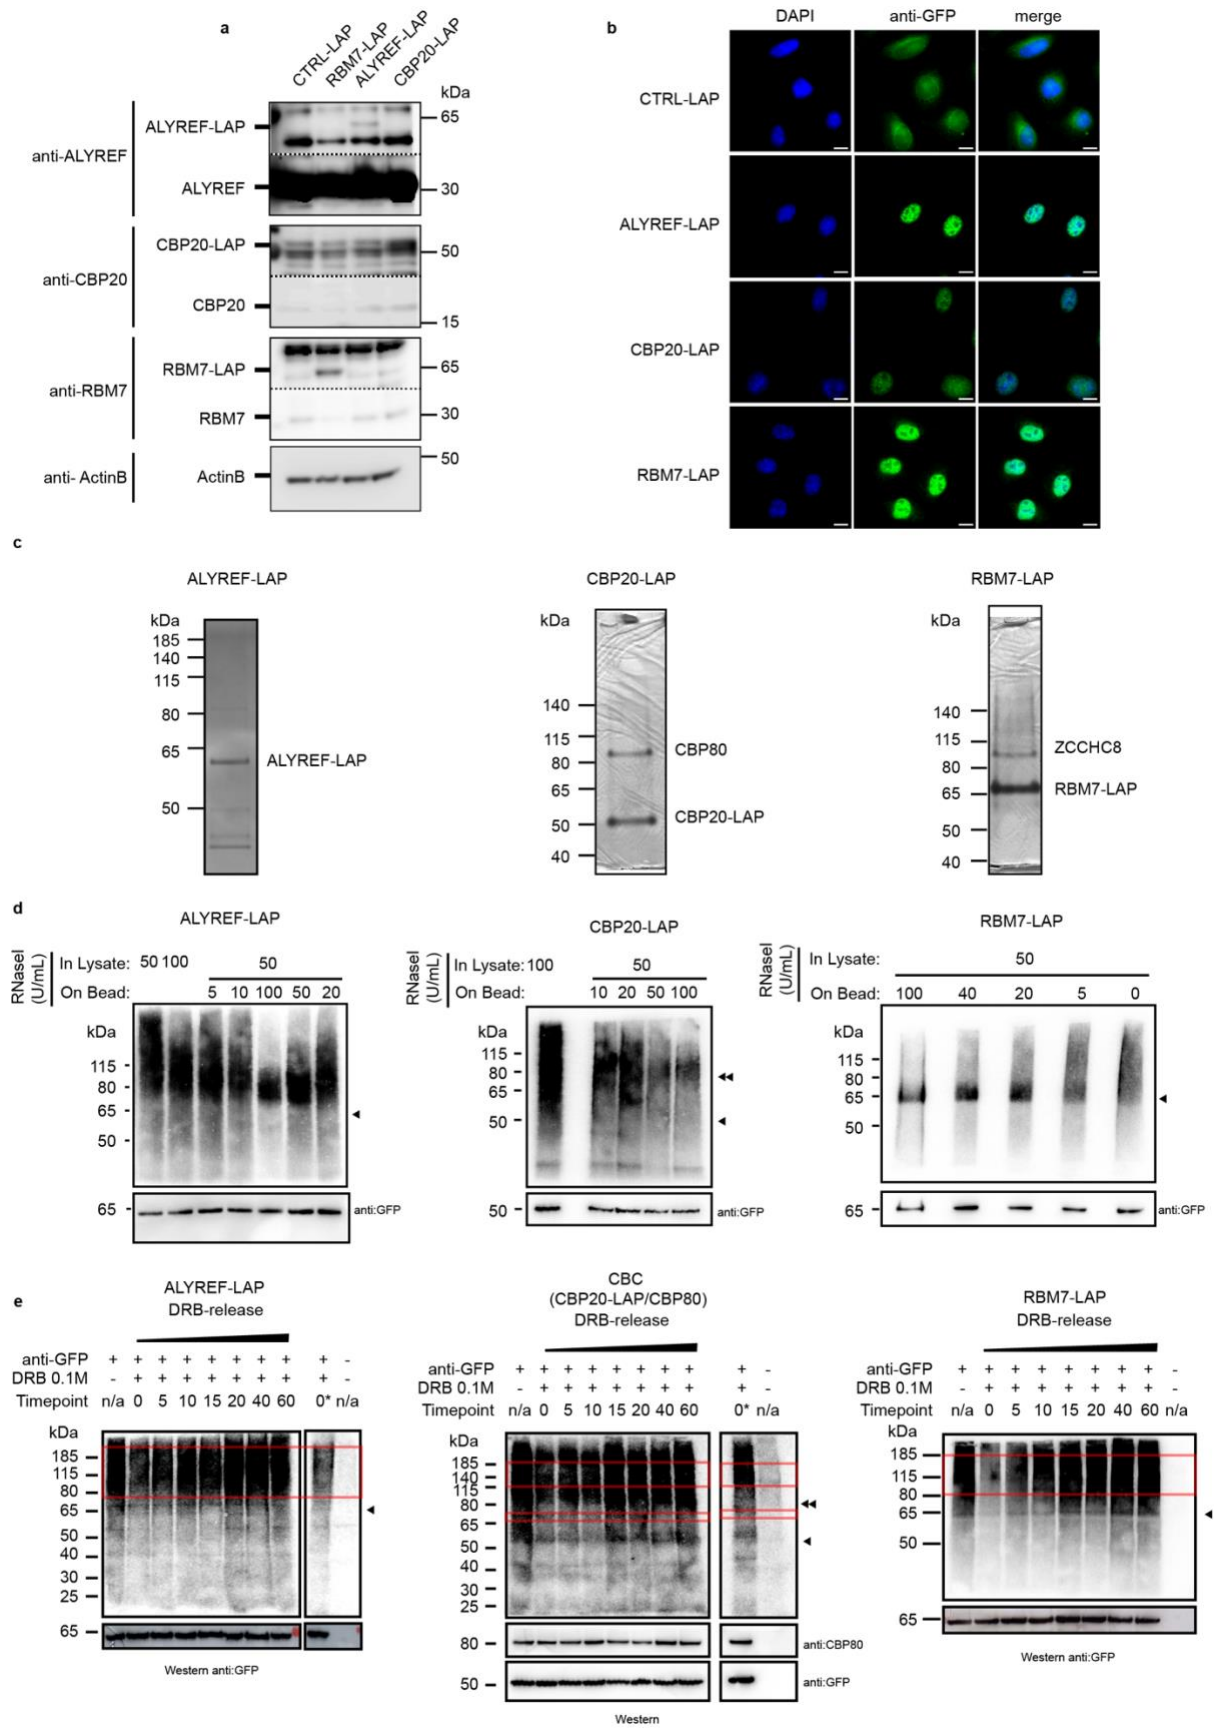

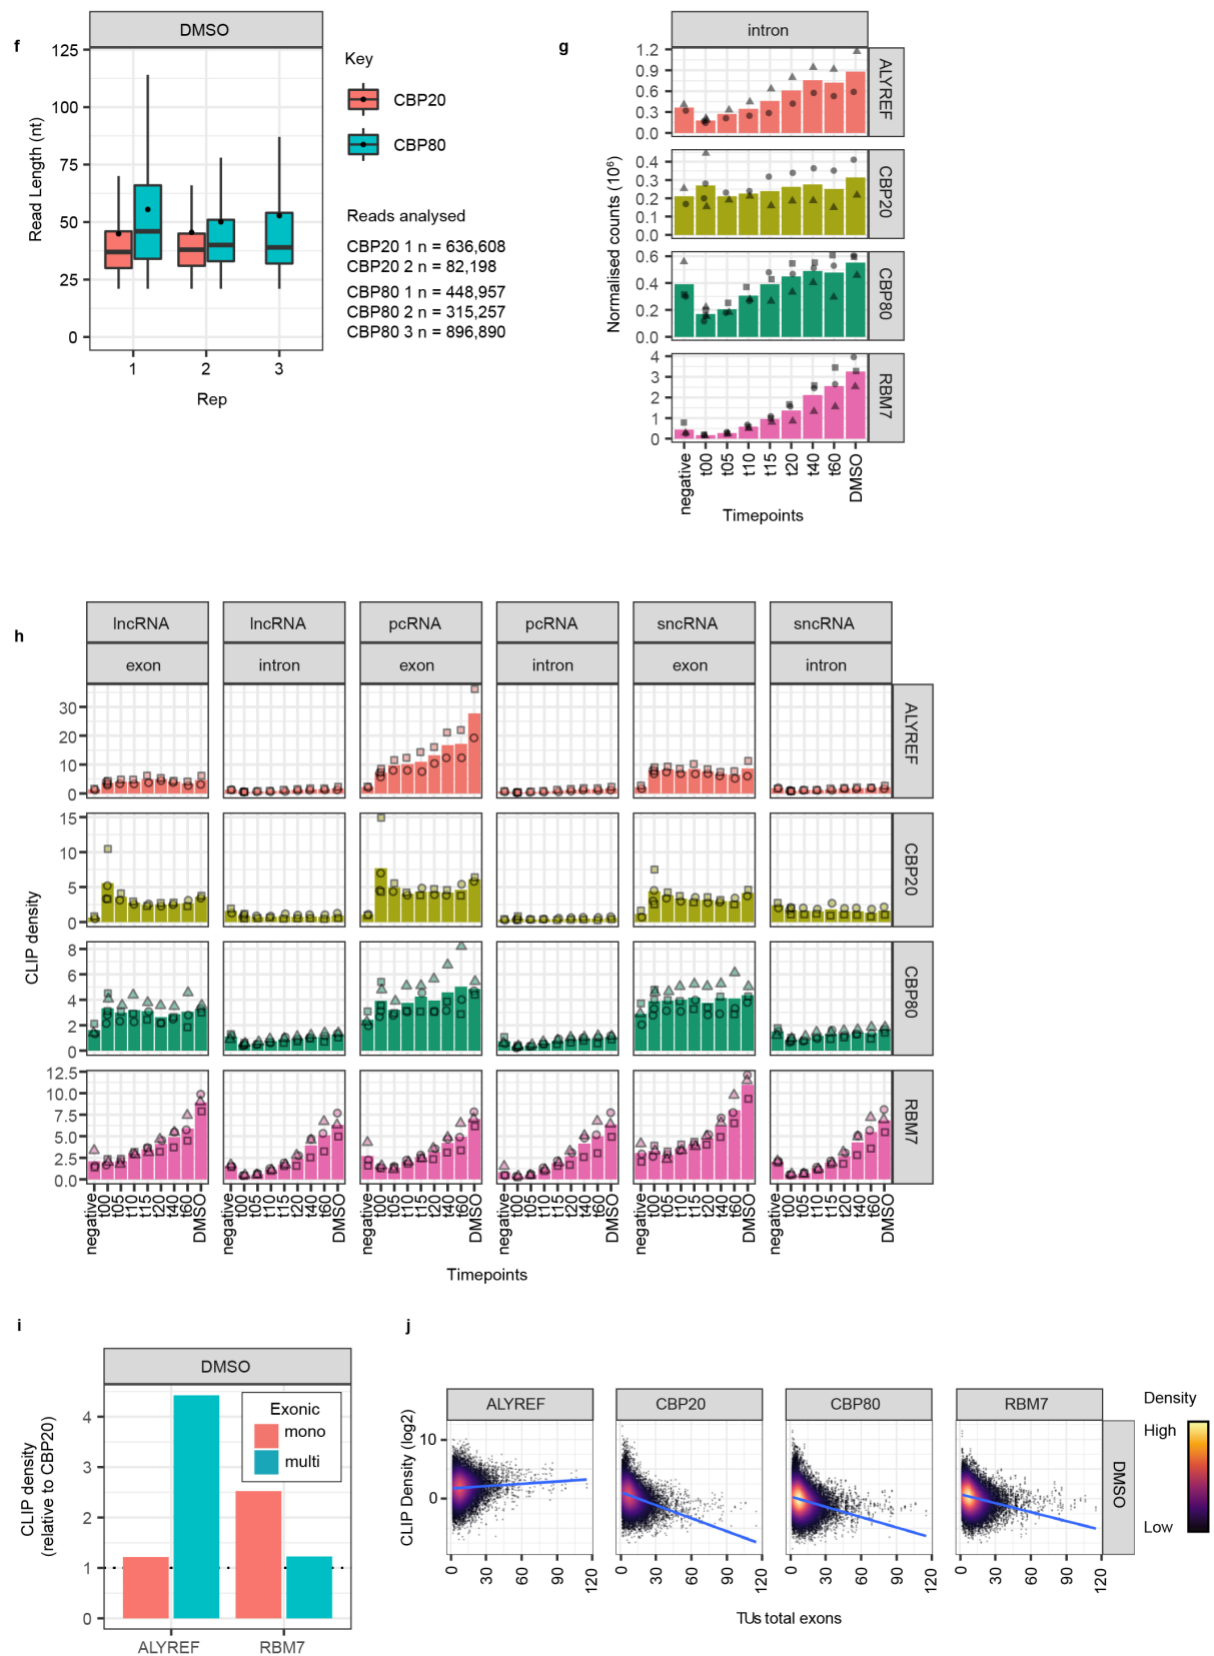

**Supplementary Fig. 1. Temporal iCLIP uncovers dynamic RBP-RNA binding profiles (related to Fig. 1).** **a** Western blotting analysis of LAP-tagged proteins and their un-tagged endogenous counterparts for all of the cell lines used. Panels separated by dashed horizontal lines are part of the same exposure, but have the intervening western blot cropped out. The control 'CTRL-LAP' cell line expressed the LAP-tag only. **b** Subcellular localisation analysis of the indicated LAP-tagged proteins. White horizontal scale bar represents 10 $\mu$ m. Displayed is a representative image of two independent

experiments. **c** SDS-PAGE followed by silver staining of immunoprecipitations of the LAP-tagged proteins. Note the co-purifying CBP80 (mid panel) and ZCCHC8 (right panel) proteins. **d** Autoradiograms displaying cross-linked and  $^{32}\text{P}$ -labelled RNPs immunoprecipitated by the indicated LAP-tagged proteins treated with varying RNaseI concentration (see Methods). Black arrows indicate the molecular weights of LAP-tagged proteins (double arrows indicate endogenous CBP80). Equal loading was demonstrated by anti-GFP western blotting analysis shown in the bottom panels. Lack of radioactive signal associated with the CBP20-RNPs (middle panel, single black arrow) is likely explained by cross-linking of CBP20 close to the 5' cap; preventing radiolabelling as the alkaline phosphatase enzyme does not convert trimethyl caps into the necessary 5'OH substrates. **e** Autoradiograms displaying cross-linked and  $^{32}\text{P}$ -labelled RNPs immunoprecipitated by the indicated LAP-tagged proteins and separated by SDS-PAGE. Note that a second timepoint 0 (0\*; referred to as t00-2 in the genome browser views) was collected for the ALYREF and CBC samples. Blank magnetic beads were used as negative controls (negative anti-GFP lanes) on unsynchronised samples. Red boxes illustrate where membranes were cut to collect material for RNA sequencing and black arrows were used as in **d**. The same membranes were blotted with anti-GFP antibodies to confirm factor migration and equal loading (panel below all autoradiograms). The 'CBC membrane' was also probed with anti-CBP80 antibodies. **f** Boxplot displaying median (bands), first and third quartiles (box),  $\pm 1.5 \times$  interquartile range (whiskers) and mean (black circles) read lengths generated from CBP20- and CBP80-DMSO tiCLIP libraries. **g** Histograms as in Fig. 1d, but showing normalised read counts mapping to introns. 11120 TUs were used in this analysis. **h** Histograms as in Fig. 1d, but for exonic and intronic regions of transcripts categorised by their coding capacity and length (long non-coding RNA (lncRNA) >200nt; protein coding RNA (pcRNA) ; short noncoding RNA (sncRNA) <200nt). **i** Histograms displaying the relative binding density for multi- and mono-exonic transcripts normalised to the CBP20-DMSO sample. DMSO timepoints shown. **j** Scatter plots showing RBP tiCLIP read densities vs. TU exon content over a total of 11240 TUs. Blue line represents linear model of data. Heat scale represents density of data points. Source data are available in the Source Data file.

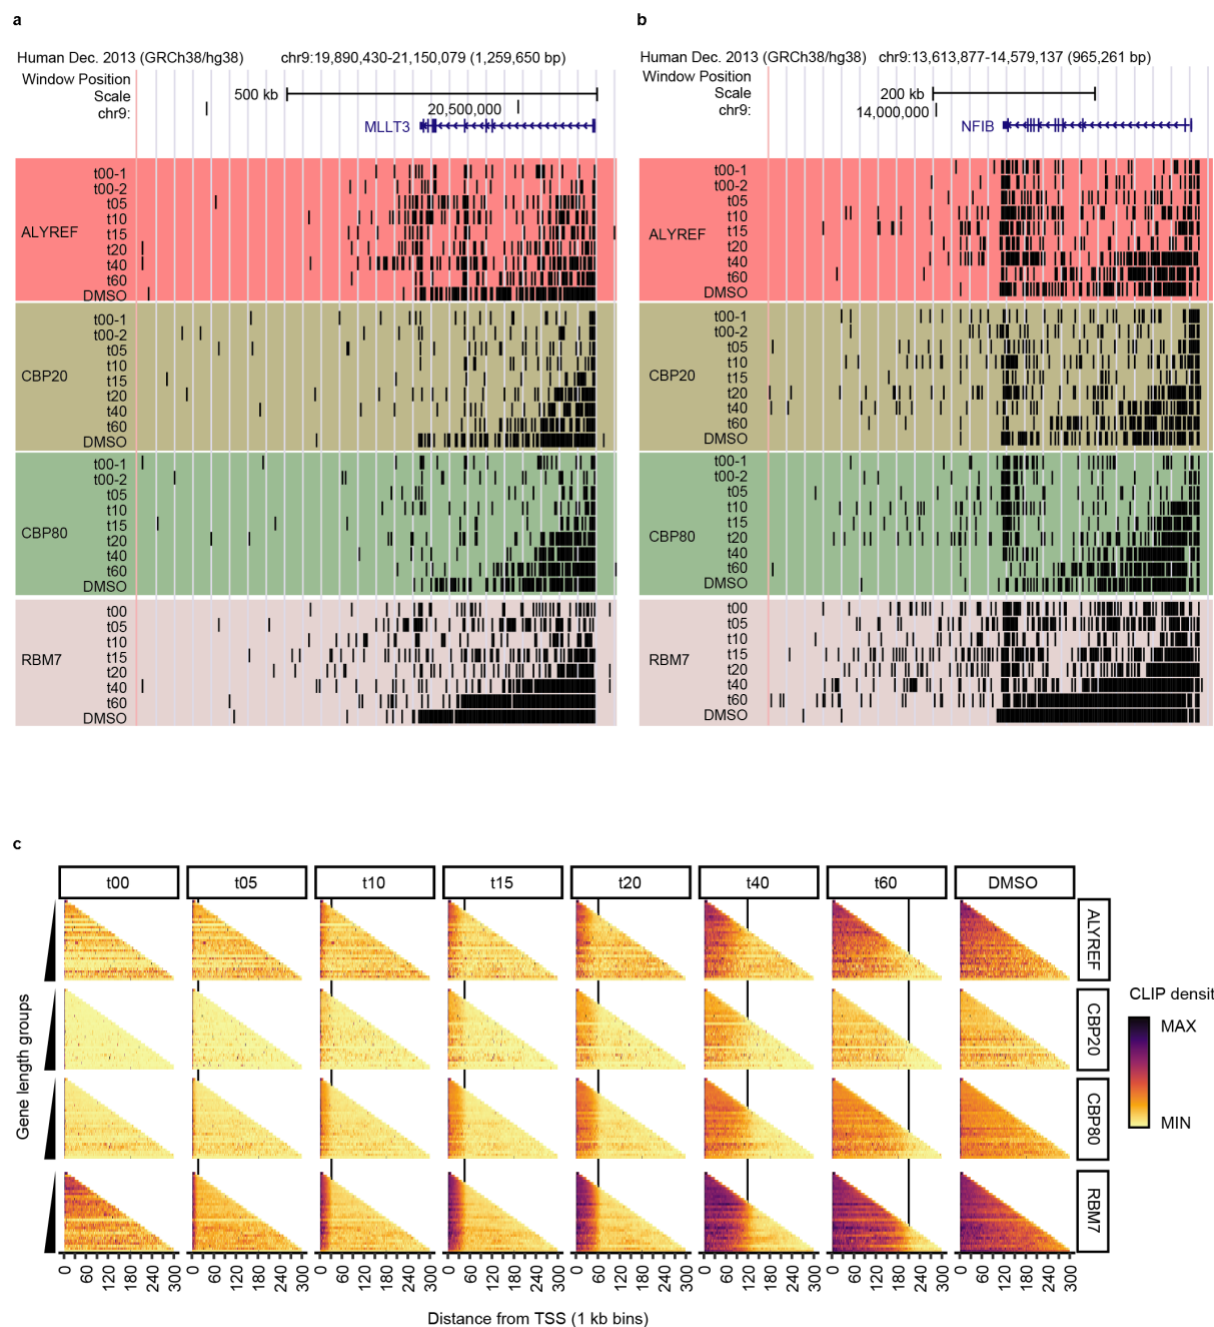

**Supplementary Fig. 2. Spatiotemporal RNA binding of the CBC, ALYREF and RBM7 is dictated by RNAPII transcription (related to Fig. 2).** a-b UCSC genome browser views of MLLT3 (a) and NFIB (b) loci, depicting regions with mapped tiCLIP reads (in black) from the indicated IP samples and timepoints. Only reads mapping to the minus strand are shown. c Heatmaps as in Fig. 2a, but generated using intronic reads only. Source data are available in the Source Data file.

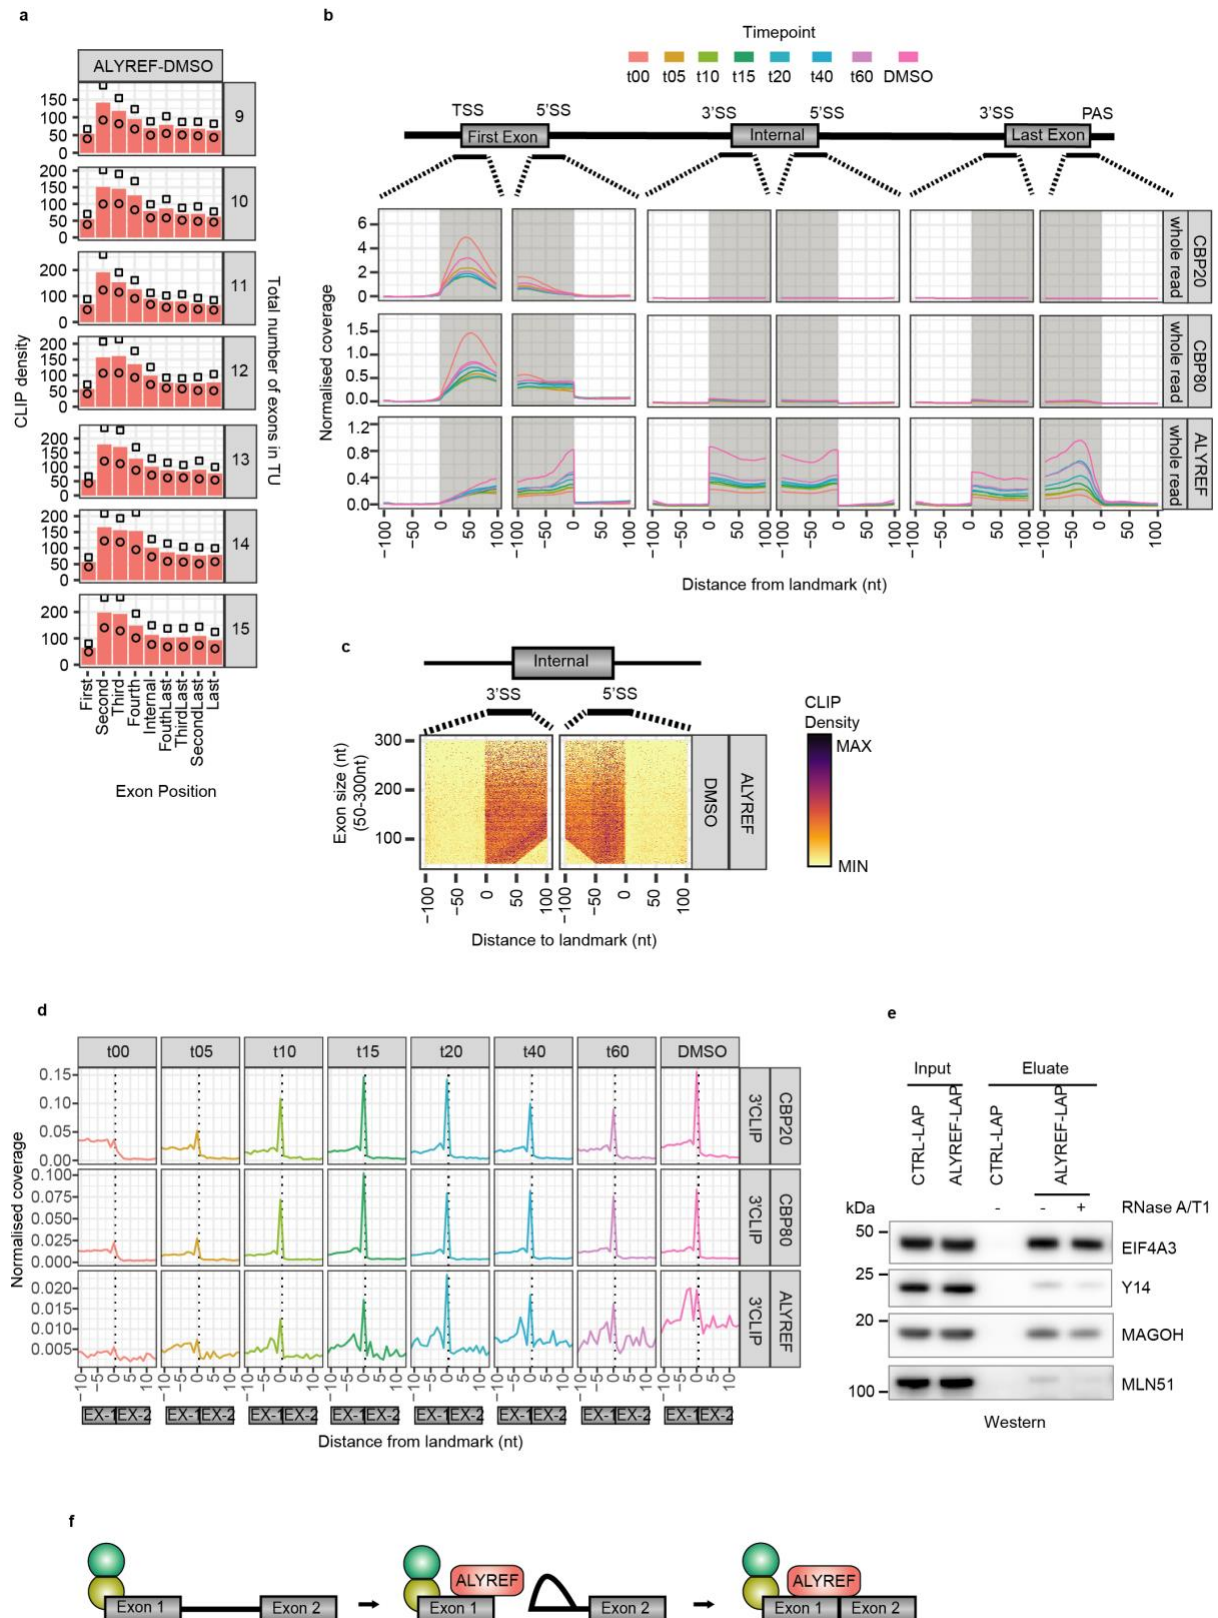

(50nt – 300nt). The values for each exon size group were normalised to the max value within that group. **d** Aggregate plots displaying normalised 3'CLIP data coverage over the last 10nt of exon 1 (EX-1) and the first 10nt of exon 2 (EX-2) for CBP20 (top), CBP80 (middle) and ALYREF (bottom). Dotted vertical line identifies exon-exon junction. **e** Western blotting analysis of ALYREF-LAP immunoprecipitates, revealing RNA-independent interactions with core members of the EJC. Note that a panel probed with anti-GFP to display equal amounts of immunoprecipitated ALYREF-LAP was previously published as Figure 2D in Dou et. al 2020<sup>1</sup>. Displayed is a representative image of two independent experiments. **f** Schematic representation of the timing by which the CBC and ALYREF associate with the nascent RNA. Source data are available in the Source Data file.

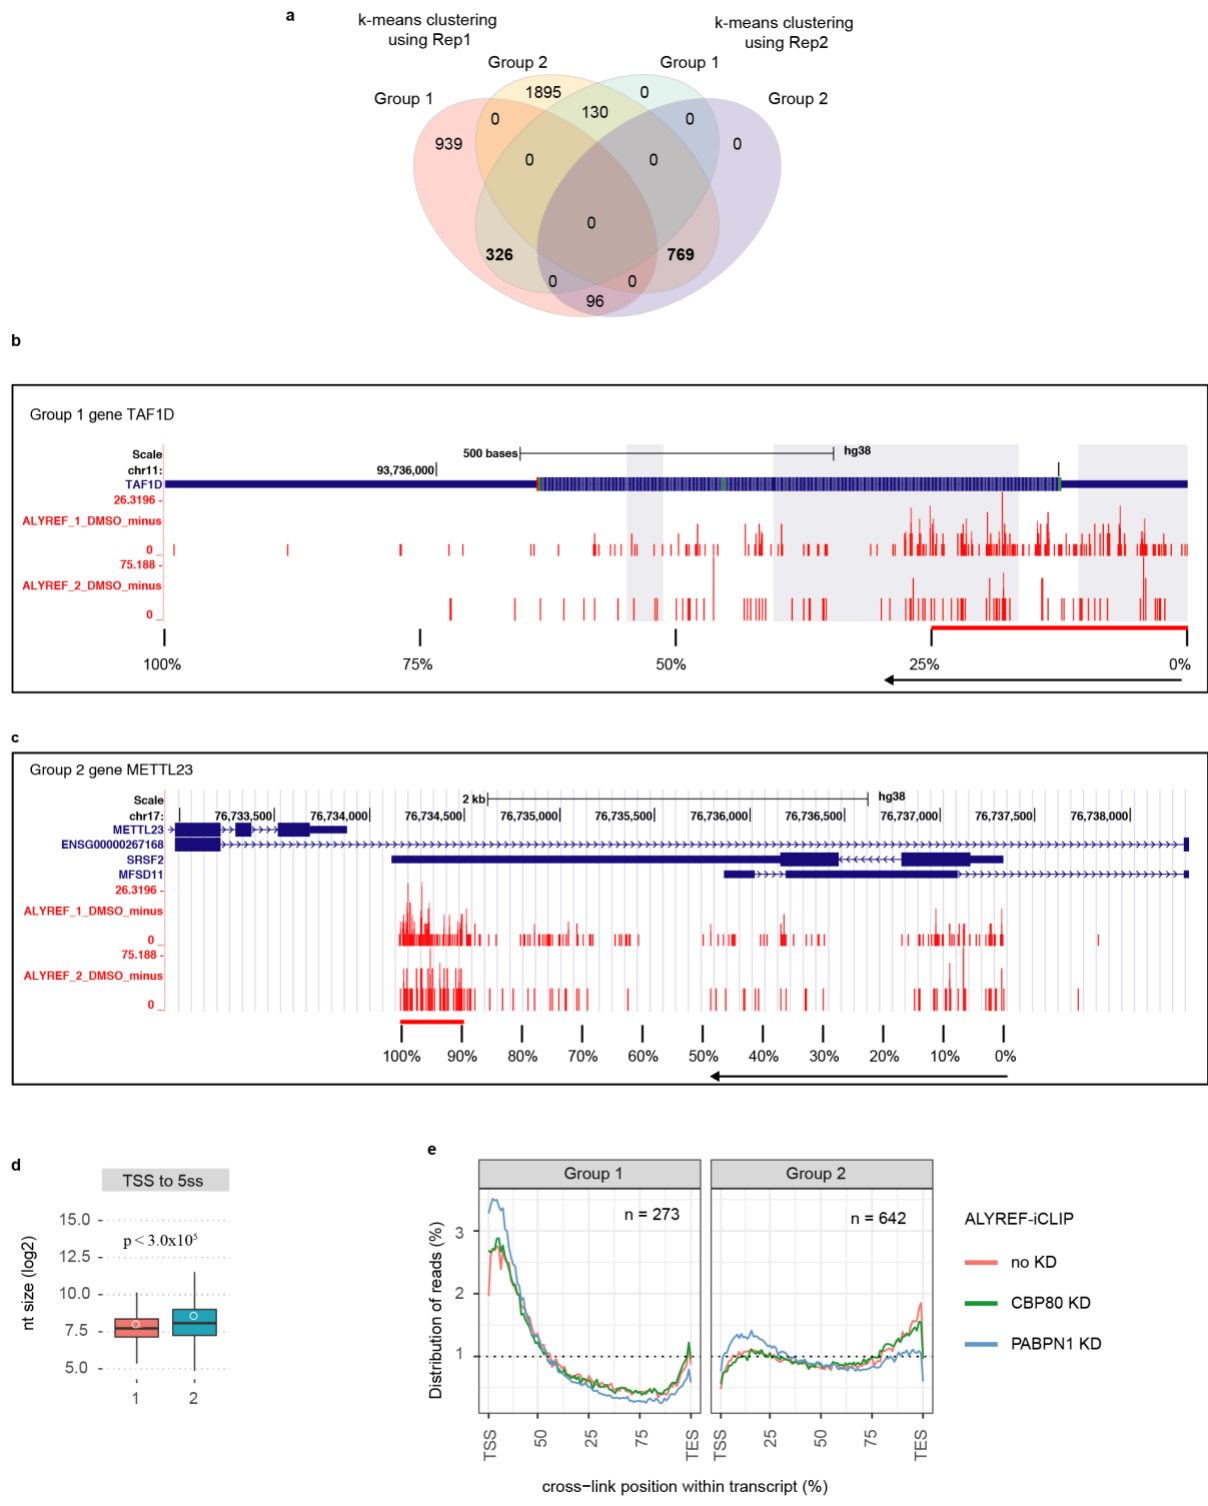

**Supplementary Fig. 4. Transcript features dictate different ALYREF anchoring profiles (related to Fig. 4).** **a** Intersection of transcription unit (TU) lists produced by k-means clustering of the independent ALYREF-DMSO replicate data (see Methods). **b-c** UCSC genome browser views of representative TUs from group 1 (**b**) or group 2 (**c**) as defined in **a**. Percentiles of TU lengths are indicated and red horizontal bars mark the first 25% (**b**) or last 10% (**c**) of the TUs. Arrows represent transcription directions. Only minus strand data are shown. Note, that for TAF1D (**b**) introns are collapsed and exons are marked by alternating white and blue shading. Red horizontal line mark high read density regions. **d** Boxplots showing distances from transcription start sites (TSSs) to the downstream 5'SSs of group 1 (red) and 2 (blue) TUs from Fig. 4b. A two-sided Wilcoxon rank sum test



was used to compare the means. No adjustments were made for multiple comparisons. p value is shown on the figure. Group 1 n = 326 genes assessed over 2 biological replicates; Group 2 n = 769 genes assessed over 2 biological replicates. **e** Average cross-link distribution profiles as in Fig. 4a, but generated from ALYREF CLIP data from Shi et al. 2017<sup>2</sup>. All TUs were normalised for length, and distribution displays reads that mapped to exonic RNA (mature RNA). Profiles were stratified into TU groups identified in **a**. The number of TUs used for analysis are displayed on the relative panel. Only TUs with CLIP signal in all ALYREF iCLIP conditions were used. 'No KD' represents a non-siRNA treated control. Source data are provided as a Source Data file.

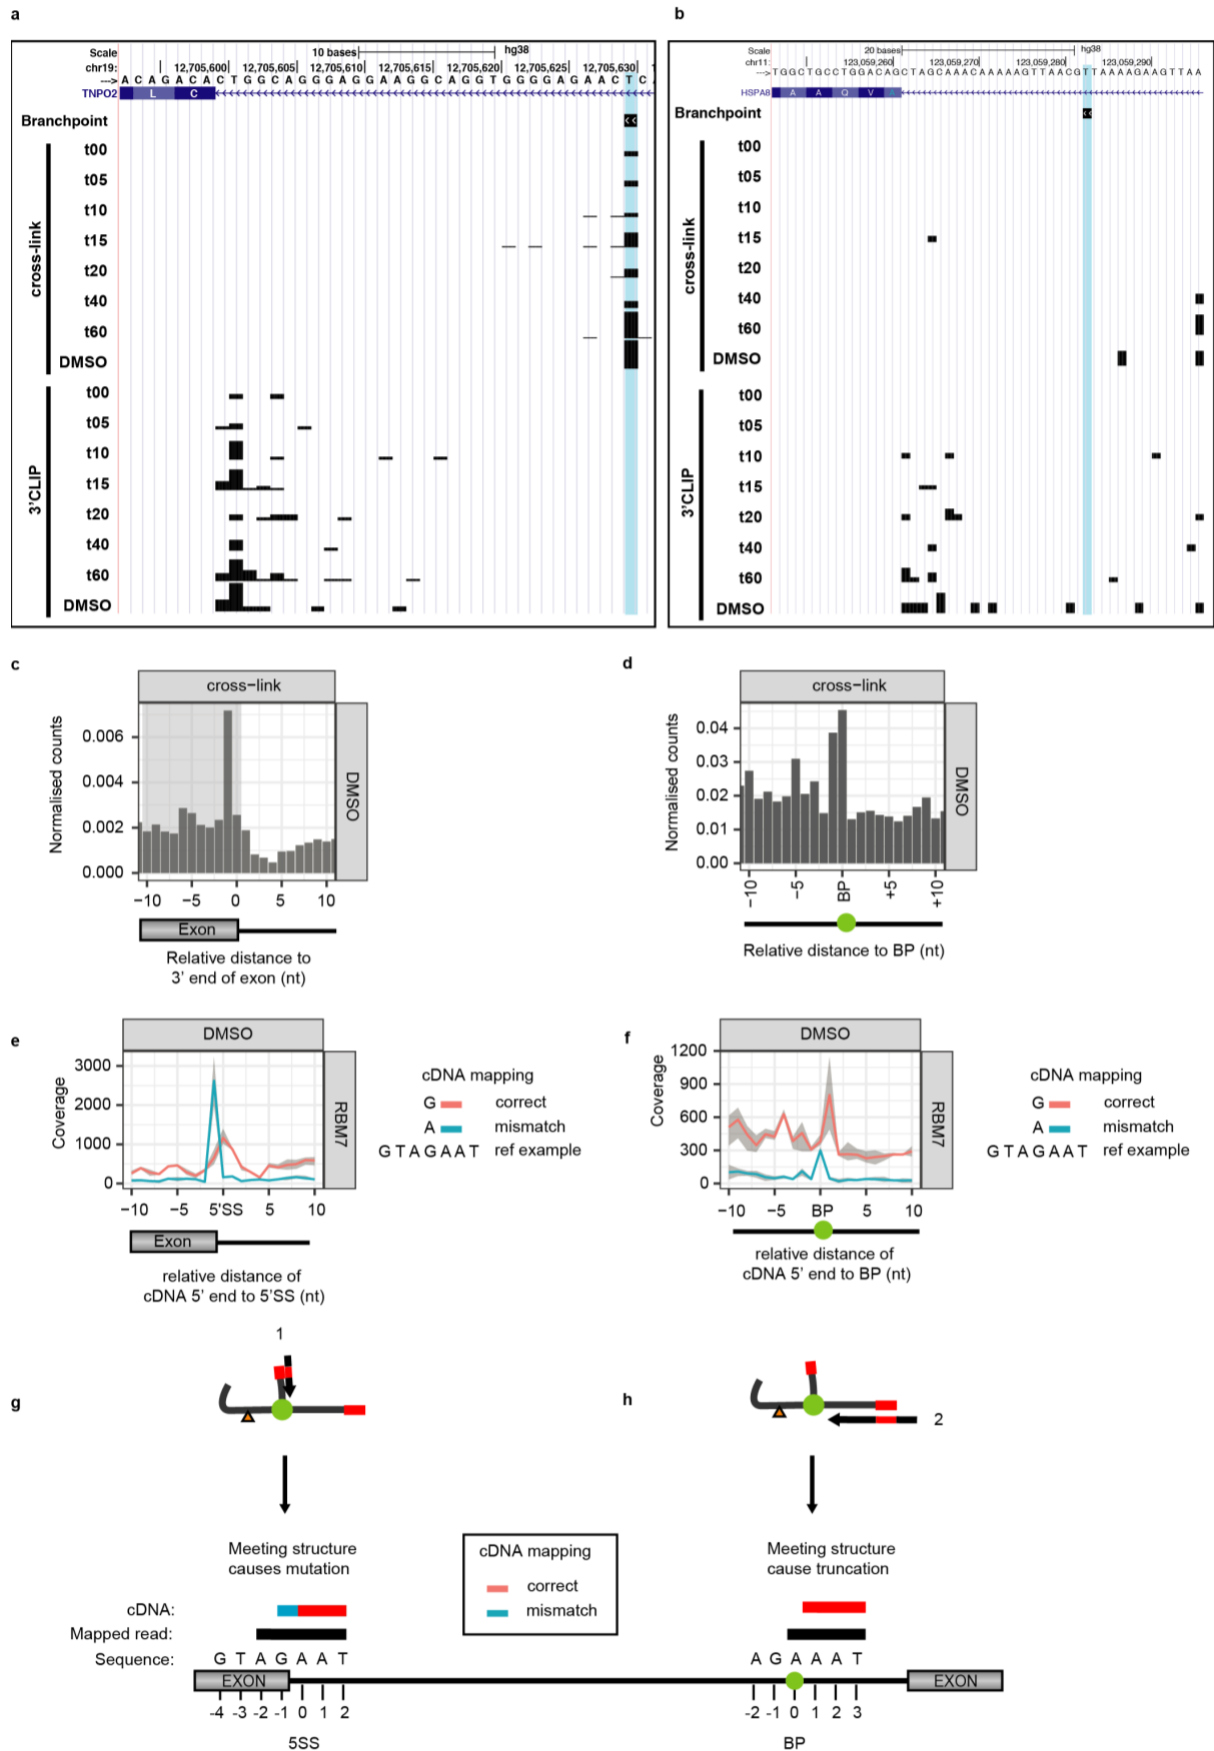

**Supplementary Fig. 5. RBM7 is recruited to introns before debranching but after the second transesterification step (related to Fig. 5). a-b UCSC genome browser views displaying representative introns with BP to 3'SS distances 30nt (a) or 21nt (b). RBM7 tiCLIP cross-link and 3'CLIP**

coverages are shown for the minus strand only. Cross-link and 3'CLIP tracks are group scaled, respectively. Blue shading identifies BP. **c-d** Quantification of RBM7 cross-link sites over exon-intron junctions (**c**) or BPs (**d**). Shaded area indicates exonic regions. **e** Aggregate plot of positions of the first nucleotide of CLIP reads relative to the 3'ends of exons. Colours indicate whether the 5'nts of reads matched the reference sequence (red) or not (blue). Grey ribbon represents confidence intervals of biological replicate samples. **f** Aggregate plot as in (**e**) but centred around BPs. **g-h** A schematic representation of cDNAs generated from the circularised (**g**) or linear (**h**) part of the lariat and their respective effects on cDNA production. '1' and '2' labelled RT primers are as in Fig. 5d. 6684 exon-intron junctions were analysed in **c** and **e**. 3782 BPs were analysed in **d** and **f**. Source data are available in the Source Data file.

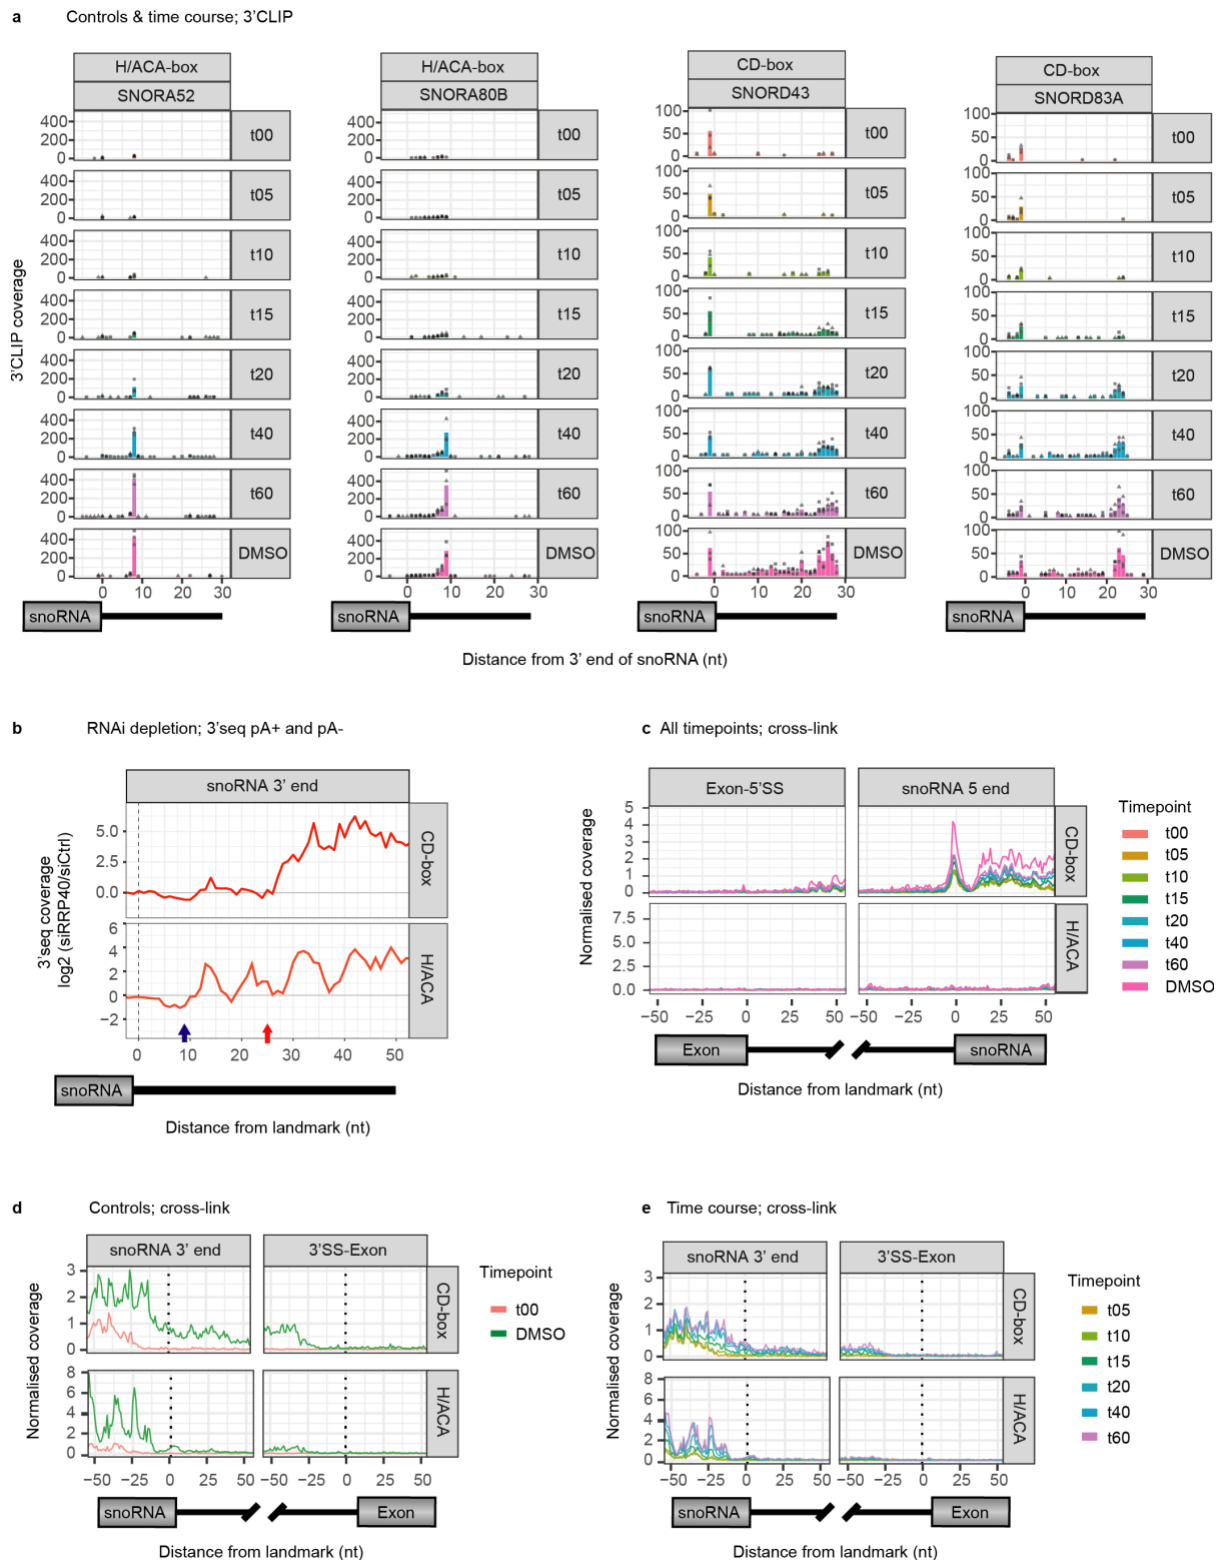

**Supplementary Fig. 6. RBM7 binds specific snoRNA intermediates (related to Fig. 6).** **a** 3'CLIP data coverage for RBM7 samples plotted at the 3'ends of representative CD- and H/ACA-box snoRNAs as indicated. Averages of 3 replicates are shown circles, squares and triangles represent individual replicates. **b** Coverage of RNA 3'-end-seq pA<sup>+</sup>/pA<sup>-</sup> data from Wu et al. 2020<sup>3</sup> plotted downstream of CD (top)- or H/ACA (bottom)-box snoRNAs. Average data from 3 replicates were converted into log<sub>2</sub> ratios of signals in siRRP40 vs. control samples. Red and blue arrows mark 3' extensions as displayed in Fig. 6g. **c** RBM7 cross-linking data plotted over a 100nt window anchored at snoRNA 5'ends (right panel) and the upstream 5'SSs (left panel) for all timepoints. Plot is stratified by CD (top)- and H/ACA (bottom)-

box snoRNAs. **d-e** as in Fig. 6a-b, but plotting RBM7 cross-linking data. Source data are provided as a Source Data file.

**Supplementary Table 1.** Table displaying key reagents, antibodies and oligo sequences used in this study.

| Misc.                                                                                    |                                                  |                     |
|------------------------------------------------------------------------------------------|--------------------------------------------------|---------------------|
| Reagent                                                                                  | Product Line                                     | Cat No.             |
| RNase I 100U/ul                                                                          | Ambion                                           | AM2295              |
| 0.2ml PCR Tube, Flat Caps, MaxyMum Recovery, Clear                                       | Axygen                                           | PCR-02-L-C          |
| CircLigase™ II ssDNA Ligase                                                              | EpiCentre                                        | CL9025K             |
| DNA LOBIND TUBES 1.5ML PCR CLEAN                                                         | Eppendorf                                        | 525-0130            |
| LoBind Tubes 2mL                                                                         | Eppendorf                                        | 30108078            |
| LoBind Tubes 1.5mL                                                                       | Eppendorf                                        | 30108051            |
| NuPAGE LDS Sample Buffer                                                                 | Invitrogen                                       | C-NP0007-X          |
| SSIV                                                                                     | Invitrogen                                       | 8090050             |
| RNASEOUT RECOM RIBONUC INHIBITOR 5,000 UNITS                                             | Invitrogen                                       | C-10777019-X        |
| Novex TBE Urea gels 6% 10 well                                                           | Invitrogen                                       | EC6865BOX           |
| NuPAGE Novex 4-12% Bis-Tris Protein 1.0mm 10 well                                        | Invitrogen                                       | NP0321BOX           |
| Accuprime supermix I                                                                     | Invitrogen                                       | 12342010            |
| Turbo DNase                                                                              | Ambion                                           | AM2238              |
| T4 RNA Ligase 2 Truncated KQ                                                             | NEB                                              | M0373L              |
| T4 PNK                                                                                   | NEB                                              | M0201L              |
| 5 DNA Adenylation Kit                                                                    | NEB                                              | E2610L              |
| NuPAGE™ MOPS SDS Running Buffer (20X)                                                    | Invitrogen                                       | NP0001              |
| NuPAGE™ Transfer Buffer (20X)                                                            | Invitrogen                                       | NP00061             |
| NuPAGE™ LDS Sample Buffer (4X)                                                           | Invitrogen                                       | NP0007              |
| cOmplete(TM) ULTRA Tablets, Mini, EDTA-free, EASYpack Protease Inhibitor Cocktail Tablet | Roche                                            | 5892791001          |
| PEG average Mn 400                                                                       | Sigma Aldrich                                    | 202398-g            |
| Costar Column                                                                            | Sigma-Aldrich Merck                              | CLS8160-96EA        |
| Whatman® glass microfiber filters, Grade GF/D                                            | Sigma-Aldrich Merck                              | WHA1823010          |
| FastAP Thermosensitive Alkaline Phosphatase (1 U/ul)                                     | ThermoFisher Scientific                          | EF0651              |
| Antibodies                                                                               |                                                  |                     |
| Reagent                                                                                  | Supplier                                         | Cat No.             |
| anti-GFP                                                                                 | Santa Cruz                                       | sc-9996             |
| anti-CBP80                                                                               | Gift from the Elisa Izzaualde laboratory         | N/A                 |
| anti-Y14                                                                                 | Gift from the Herve Le Hir laboratory            | N/A                 |
| anti-MLN51                                                                               | Gift from C.L. Tomasetto                         | N/A                 |
| anti-EIF4A3                                                                              | Gift from the Herve Le Hir laboratory            | N/A                 |
| anti-MAGOH                                                                               | Santa Cruz                                       | sc56724             |
| GFP-TRAP_MA                                                                              | Chromotek                                        | gtma-20             |
| Binding Control MA                                                                       | Chromotek                                        | btma-20             |
| anti-ALYREF                                                                              | Abcam                                            | ab202894            |
| anti-RBM7                                                                                | ProteinTech                                      | 21896-1-AP          |
| goat anti-rabbit-hrp polyclonal antibody                                                 | Dako                                             | P0448               |
| goat anti-mouse-hrp polyclonal antibody                                                  | Dako                                             | P0447               |
| Alexa 488 conjugated Goat Anti mouse IgG (H+L)                                           | ThermoFisher                                     | A-11001             |
| Oligos                                                                                   |                                                  |                     |
| ID                                                                                       | Sequence                                         | Purification Method |
| L3_pDNA_BC03                                                                             | /5Phos/NTTTCTAACAGATCGGAAGAGCGGTTTCAG/3SpC3/     | Rnase Free HPLC     |
| L3_pDNA_BC08                                                                             | /5Phos/NTACAGATGAGATCGGAAGAGCGGTTTCAG/3SpC3/     | Rnase Free HPLC     |
| L3_pDNA_BC15                                                                             | /5Phos/NACATTATTAGATCGGAAGAGCGGTTTCAG/3SpC3/     | Rnase Free HPLC     |
| L3_pDNA_BC17                                                                             | /5Phos/NTACAACATAGATCGGAAGAGCGGTTTCAG/3SpC3/     | Rnase Free HPLC     |
| L3_pDNA_BC18                                                                             | /5Phos/NGCAGCCACAGATCGGAAGAGCGGTTTCAG/3SpC3/     | Rnase Free HPLC     |
| L3_pDNA_BC21                                                                             | /5Phos/NCGGAGGGCAGATCGGAAGAGCGGTTTCAG/3SpC3/     | Rnase Free HPLC     |
| L3_pDNA_BC24                                                                             | /5Phos/NATCACTTGAGATCGGAAGAGCGGTTTCAG/3SpC3/     | Rnase Free HPLC     |
| L3_pDNA_BC25                                                                             | /5Phos/NAGAATTATAGATCGGAAGAGCGGTTTCAG/3SpC3/     | Rnase Free HPLC     |
| L3_pDNA_BC26                                                                             | /5Phos/NGGCCAAGAGATCGGAAGAGCGGTTTCAG/3SpC3/      | Rnase Free HPLC     |
| L3_pDNA_BC31                                                                             | /5Phos/NAAGTGTGAGATCGGAAGAGCGGTTTCAG/3SpC3/      | Rnase Free HPLC     |
| cut_Rt1clip                                                                              | /5Phos/NNAACNNNAGATCGGAAGAGCGTCGTGgatcCTGAACCGC  | Standard Desalting  |
| cut_Rt2clip                                                                              | /5Phos/NNACAANNNAGATCGGAAGAGCGTCGTGgatcCTGAACCGC | Standard Desalting  |
| cut_Rt3clip                                                                              | /5Phos/NNATTGNNNAGATCGGAAGAGCGTCGTGgatcCTGAACCGC | Standard Desalting  |
| cut_Rt4clip                                                                              | /5Phos/NNAGGTNNNAGATCGGAAGAGCGTCGTGgatcCTGAACCGC | Standard Desalting  |
| cut_Rt6clip                                                                              | /5Phos/NNCCGGNNNAGATCGGAAGAGCGTCGTGgatcCTGAACCGC | Standard Desalting  |
| cut_Rt7clip                                                                              | /5Phos/NNCTAANNNAGATCGGAAGAGCGTCGTGgatcCTGAACCGC | Standard Desalting  |

|              |                                                              |                    |
|--------------|--------------------------------------------------------------|--------------------|
| cut_Rt8clip  | /5Phos/NNCATTNNNAGATCGGAAGAGCGTCGTGgatcCTGAACCGC             | Standard Desalting |
| cut_Rt9clip  | /5Phos/NNGCCANNNAGATCGGAAGAGCGTCGTGgatcCTGAACCGC             | Standard Desalting |
| cut_Rt11clip | /5Phos/NNGGTTNNNAGATCGGAAGAGCGTCGTGgatcCTGAACCGC             | Standard Desalting |
| cut_Rt12clip | /5Phos/NNGTGGNNNAGATCGGAAGAGCGTCGTGgatcCTGAACCGC             | Standard Desalting |
| cut_Rt13clip | /5Phos/NNTCCGNNNAGATCGGAAGAGCGTCGTGgatcCTGAACCGC             | Standard Desalting |
| cut_Rt14clip | /5Phos/NNTGCCNNNAGATCGGAAGAGCGTCGTGgatcCTGAACCGC             | Standard Desalting |
| cut_Rt15clip | /5Phos/NNTATTNNNAGATCGGAAGAGCGTCGTGgatcCTGAACCGC             | Standard Desalting |
| cut_Rt16clip | /5Phos/NNTTAANNNAGATCGGAAGAGCGTCGTGgatcCTGAACCGC             | Standard Desalting |
| cut_oligo    | GTTCAGGATCCACGACGCTCTTCAAAA                                  | Standard Desalting |
| P5Solexa     | AATGATACGGCGACCAACCGAGATCTACACTCTTTCCCTACACGACGCTCTTCCGATCT  | Standard Desalting |
| P3Solexa     | CAAGCAGAAGACGGCATACGAGATCGGTCTCGGCATTCTGCTGAACCGCTCTTCCGATCT | Standard Desalting |

**Supplementary Table 2.** Composition of buffers used in the tiCLIP protocol.

|                                                        |                      |
|--------------------------------------------------------|----------------------|
| <b>LB - Lysis Buffer</b>                               | <b>Working Conc.</b> |
| Tris/HCl, pH 8.0                                       | 50mM                 |
| NaCl                                                   | 100mM                |
| Triton-X100                                            | 0.5% (v/v)           |
| Na-deoxycholate                                        | 0.25% (w/v)          |
| EDTA                                                   | 5mM                  |
| <b>To be added to 50mL aliquot fresh</b>               |                      |
| 1mM DTT (fresh)                                        | 1mM                  |
| complete EDTA-free protease inhibitor cocktail (Roche) | 1x                   |
| SDS                                                    | 0.10%                |
| <b>HSW - High-salt wash buffer</b>                     | <b>Working Conc.</b> |
| Tris/HCl, pH 8.0                                       | 20mM                 |
| NaCl                                                   | 1M                   |
| Triton-X100                                            | 0.5% (v/v)           |
| Na-deoxycholate                                        | 0.5% (w/v)           |
| EDTA                                                   | 5mM                  |
| SDS                                                    | 0.10%                |
| <b>To be added to 50mL aliquot fresh</b>               |                      |
| Urea (add 6g solid)                                    | 2M                   |
| DTT (add fresh)                                        | 1mM                  |
| complete EDTA-free protease inhibitor cocktail (Roche) | 1x                   |
| <b>LCW - LiCl wash</b>                                 | <b>Working Conc.</b> |
| Tris/HCl, pH 8.0                                       | 50mM                 |
| LiCl                                                   | 250mM                |
| TritonX100                                             | 0.5% (v/v)           |
| Na-deoxycholate                                        | 0.5% (w/v)           |
| EDTA                                                   | 1mM                  |
| <b>NSB - No-salt wash buffer</b>                       | <b>Working Conc.</b> |
| Tris/HCl, pH 8.0                                       | 50mM                 |
| (v/v) Tween                                            | 0.2%                 |
| MgCl <sub>2</sub>                                      | 10mM                 |
| <b>DPB - Dephosphorylation buffer</b>                  | <b>Working Conc.</b> |
| Tris-HCl, pH 8.0                                       | 50mM                 |
| NaCl                                                   | 100mM                |
| MgCl <sub>2</sub>                                      | 10mM                 |
| <b>PWB - Phosphatase wash buffer</b>                   | <b>Working Conc.</b> |
| Tris-HCl, pH 7.5                                       | 50mM                 |
| EGTA (pH 8)                                            | 20mM                 |
| TritonX                                                | 0.5% (v/v)           |
| <b>PNKW - PNK buffer</b>                               | <b>Working Conc.</b> |
| Tris-HCl, pH 7.5                                       | 50mM                 |
| NaCl                                                   | 50mM                 |
| MgCl <sub>2</sub>                                      | 10mM                 |
| <b>LIGBx1 - Ligation Buffer (1x)</b>                   | <b>Working Conc.</b> |
| Tris-HCl                                               | 50mM                 |
| MgCl <sub>2</sub>                                      | 10mM                 |



### Supplementary References

1. Dou, Y. *et al.* NCBP3 positively impacts mRNA biogenesis. *Nucleic Acids Res.* **48**, 10413–10427 (2020) doi: 10.1093/nar/gkaa744.
2. Shi, M. *et al.* ALYREF mainly binds to the 5' and the 3' regions of the mRNA in vivo. *Nucleic Acids Res.* **45**, 9640–9653 (2017) doi: 10.1093/nar/gkx597.
3. Wu, G. *et al.* A Two-Layered Targeting Mechanism Underlies Nuclear RNA Sorting by the Human Exosome. *Cell Rep.* **30**, 2387-2401.e5 (2020) doi: 10.1016/j.celrep.2020.01.068.
